# Supplementary material for: Alumina-entrapped Ag catalyzed nitro compounds coupled with alcohols using borrowing hydrogen methodology
Source: Royal Society of Chemistry journal article supplement (doi:10.1039/c5cp00330j), 2015-01-01
Supplement: c5cp00330j1.pdf [file c5cp00330j1.pdf]

## Experimental and Catalytic Testing

### Synthesis of Ag/Al<sub>2</sub>O<sub>3</sub> catalysts

The alumina-supported Ag catalysts discussed were prepared with Ag loadings from 0.29 to 13 wt. % using the entrapped method. In a typical synthesis for a 2.4 wt. % Ag/Al<sub>2</sub>O<sub>3</sub> sample, AgNO<sub>3</sub> (63 mg/0.37 mmol) and aluminium tri-*sec*-butoxide (8.32 ml/32.4 mmol) were dissolved in 2-butanol (1.98 ml). The resulting gel was stirred at 100 °C for 3 h to give a yellow suspension. At this point, 4.5 ml of deionized water were slowly added and the clear gel hydrolyzed instantly. Stirring was continued for another hour at 100 °C, before the suspension was allowed to cool to room temperature. The solid catalyst was filtered off, and the filter cake thoroughly washed with acetone, dried at 100 °C and calcined for 1 h at 600 °C (10 °C/min ramp). Prior to use, the catalyst was activated in flowing H<sub>2</sub> at 300 °C for 30 min. The same procedure was followed for preparing Cu/Al<sub>2</sub>O<sub>3</sub> catalysts except that copper acetate was used. The metal content was determined by ICP-AES.

### Procedure for N-alkylation of nitroarenes using alcohols

The catalytic N-alkylation of nitroarenes using alcohols was carried out under N<sub>2</sub> at 140 °C in a 25 ml round bottom flask equipped with a condenser. Typically, 1.0 mmol nitrobenzene and 6 mmol of benzyl alcohol were dissolved in 5 ml p-xylene; 0.100 g catalyst and 0.1 g base promoter were added. Aliquots were removed at regular time intervals and analyzed by gas chromatography. The products were identified by GC-MS.

**Table S1** Effect of the ratio benzyl alcohol/nitrobenzene on the activity after 19 h

| Ratio of benzyl alcohol/nitrobenzene | Conv. | Sel.(3) | Sel.(4) | Sel.(5) | Sel.(6) |
|--------------------------------------|-------|---------|---------|---------|---------|
| 3                                    | 100   | 8       | 13      | 60      | 19      |
| 6                                    | 100   | 98      | 2       | 0       | 0       |
| 8                                    | 100   | 92      | 7       | 1       | 0       |
| 12                                   | 100   | 96      | 4       | 0       | 0       |

Reaction condition: nitrobenzene 1 mmol,  
Catalyst 100 mg metal 2.2 mol%, 100 mg Cs<sub>2</sub>CO<sub>3</sub> 100 mg 140 °C flowing N<sub>2</sub> 19 h

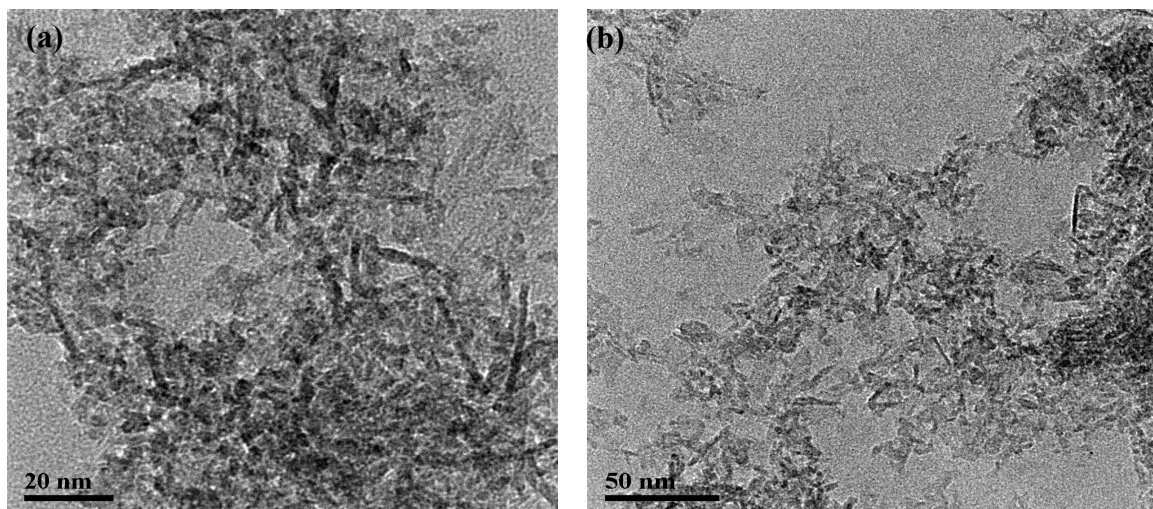

Figure S1. TEM image of the 2.4 wt% (a) before the reaction (b) after the reaction

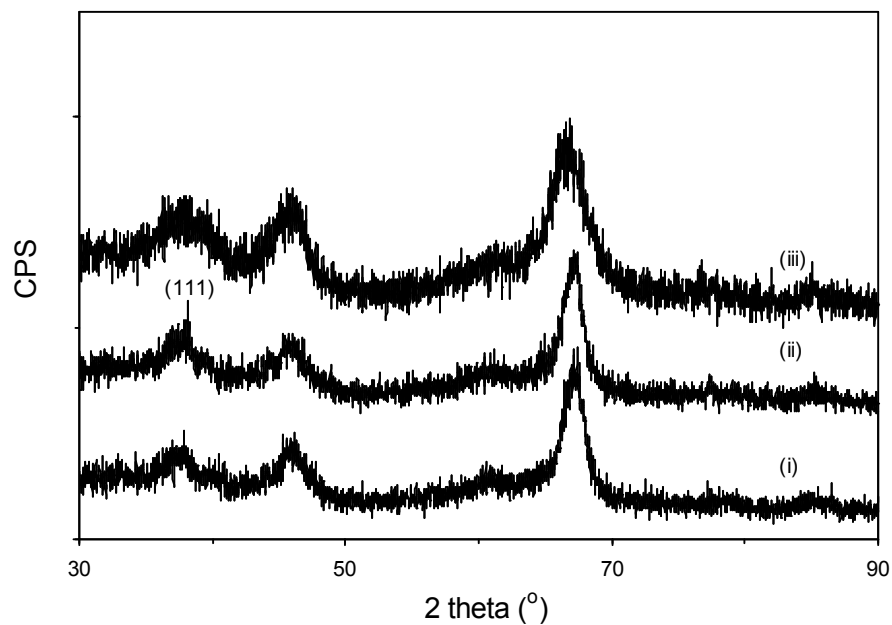

Figure S2. XRD diffractogram (i) commercial  $\gamma$ - $\text{Al}_2\text{O}_3$  (ii) 2.4 wt% Ag/ commercial  $\gamma$ - $\text{Al}_2\text{O}_3$  from wet impregnation method (crystalline size calculated to be 5.4 nm) (iii) 2.4 wt% Ag/  $\gamma$ - $\text{Al}_2\text{O}_3$  from sol-gel method.

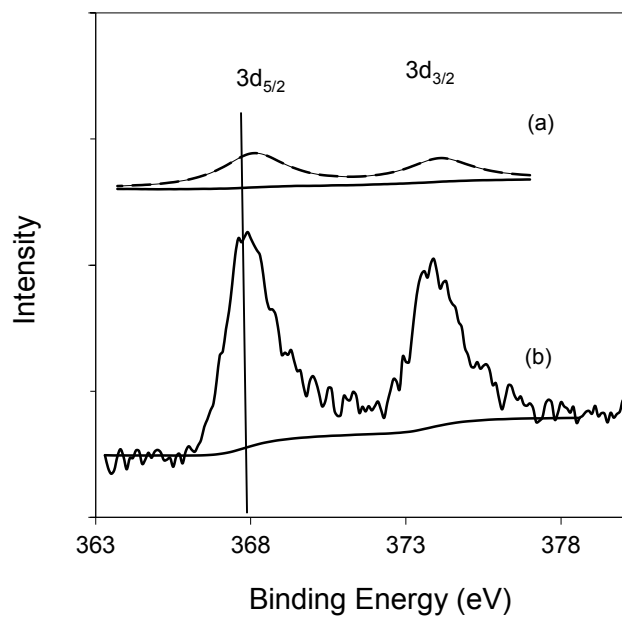

Fig S3 Ag XPS spectrum of (a) Ag/Al<sub>2</sub>O<sub>3</sub> and (b) bulk Ag

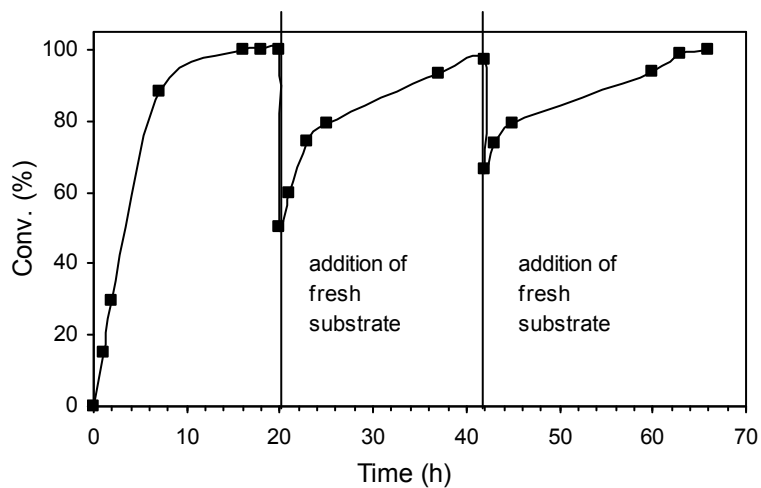

**Figure S4.** Recycling of Catalyst. Reaction condition: nitrobenzene 1 mmol, benzyl alcohol 6 mmol, basic additives 100mg, xylene 5 ml, Cat 2.2 mol%

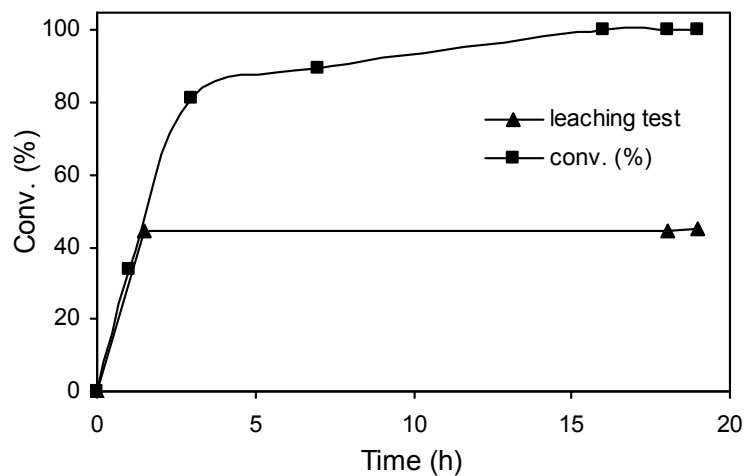

**Figure S5.** N-alkylation of nitrobenzene with benzyl alcohol in the presence (■) and absence (▲) of 2.4 wt % Ag/Al<sub>2</sub>O<sub>3</sub> (catalyst was removed by filtration after 2 h). Reaction conditions: nitrobenzene 1 mmol, benzyl alcohol 6 mmol, Catalyst 100 mg metal 2.2 mol%, 100 mg Cs<sub>2</sub>CO<sub>3</sub> 100 mg 140 °C flowing N<sub>2</sub> 19 h
